# Supplementary material for: Rules and trends of metal cation driven hydride-transfer mechanisms in metal amidoboranes
Source: Royal Society of Chemistry journal article supplement (doi:10.1039/b925235e), 2010-01-01
Supplement: b925235e.pdf [file b925235e.pdf]

# Rules and Trends of Metal Cation Driven Hydride-Transfer Mechanisms in Metal Amidoboranes

**Dong Young Kim, Han Myoung Lee, Jongcheol Seo, Seung Koo Shin and Kwang S. Kim\***

**Department of Chemistry, Pohang University of Science and Technology**

**Pohang, 790-784 (Republic of Korea)**

**E-mail\*: [kim@postech.ac.kr](mailto:kim@postech.ac.kr)**

| <b>Contents</b>                                                                                          | <b>page</b> |
|----------------------------------------------------------------------------------------------------------|-------------|
| H <sub>2</sub> -loss pathways from dimeric $M(\text{NH}_2\text{BH}_3)$                                   | <b>S1</b>   |
| <b>Fig. S1</b> Systematic increase of the activation energies in the H-steps                             | <b>S2</b>   |
| <b>Fig. S2</b> Resonance ( $M\text{-N-B=N}\cdots M \leftrightarrow M\cdots\text{N=B-N-M}$ ) hybrid bonds | <b>S3</b>   |
| Kinetic scheme of the O/D-pathway                                                                        | <b>S4</b>   |
| <b>Fig. S3</b> Microcanonical rate-energy curve at 0 K                                                   | <b>S5</b>   |
| Thermal rate constants of $k_{\text{cat1}}/k_{\text{cat1}}'/k_{\text{cat2}}'$ (in $\text{s}^{-1}$ )      | <b>S6</b>   |
| Relative energies along the reaction pathways.                                                           | <b>S8</b>   |

**H<sub>2</sub>-loss pathways from dimeric *M*(NH<sub>2</sub>BH<sub>3</sub>) (Figure 1d, e).**

H<sub>2</sub> is released by as H<sup>δ-</sup> atom transfer from a boron atom to a H<sup>δ+</sup> atom bonded to a nitrogen atom due to an alkali or alkaline-earth metal cation with/without oligomerization, denoted as the **O/D**-pathway. In the **O/D**-pathway, the metal hydride *M*-H in **2<sub>M</sub>** is formed in the first reaction step through **T1<sub>M</sub>** (1, 2).

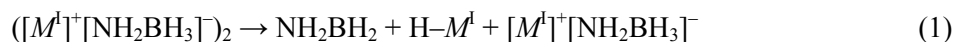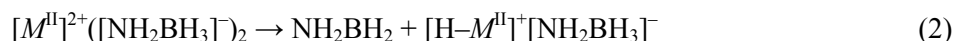

In the **O**-pathway, the intermolecular N-B bond in **2<sup>O</sup>** forms through **T2<sup>O</sup>** (3, 4).

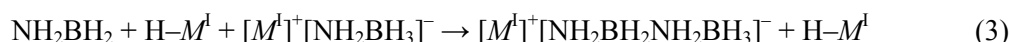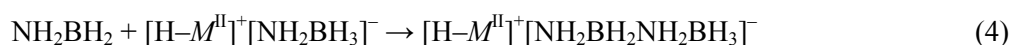

Then, first H<sub>2</sub> is released by the ionic recombination of H<sup>δ-</sup> with H<sup>δ+</sup> through **T2<sup>O</sup><sub>H</sub>** forming **3<sup>O</sup>** (5, 6).

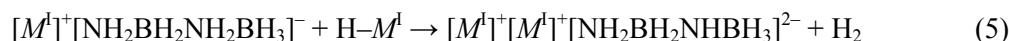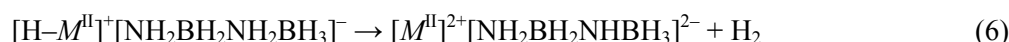

Second H<sub>2</sub> also occurs by the formation of *M*-H, **T3<sup>O</sup><sub>M</sub>** → **4<sup>O</sup><sub>M</sub>** (7, 8), followed by the ionic reaction of the *M*-H<sup>δ-</sup> ⋯ H<sup>δ+</sup>-N dihydrogen bond, **T4<sup>O</sup><sub>H</sub>** → **5<sup>O</sup>** (9, 10).

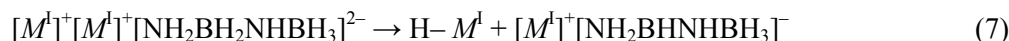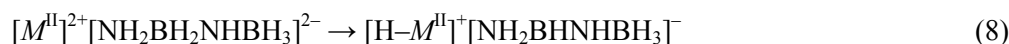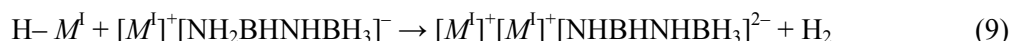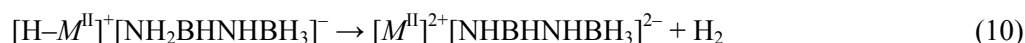

In the **D**-pathway, two molar equivalents of H<sub>2</sub> release without oligomerization by the redox reaction of H<sup>δ-</sup> and H<sup>δ+</sup> in **T2<sub>H</sub>** → **3** (11, 12), by the formation of *M*-H in **T3<sub>M</sub>** → **4<sub>M</sub>** (13, 14), and by the redox reaction of H<sup>δ-</sup> and H<sup>δ+</sup> in **T4<sub>H</sub>** → **5** (15, 16).

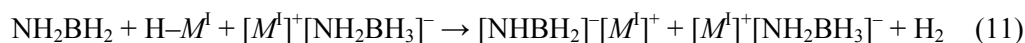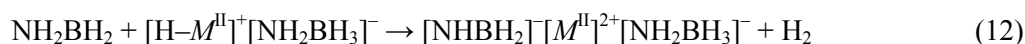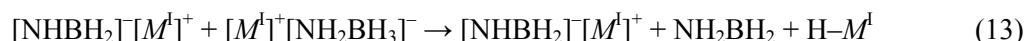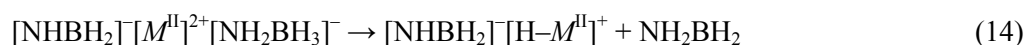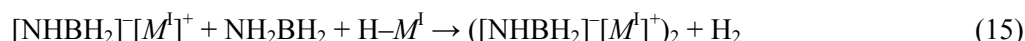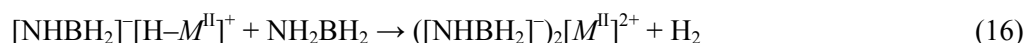

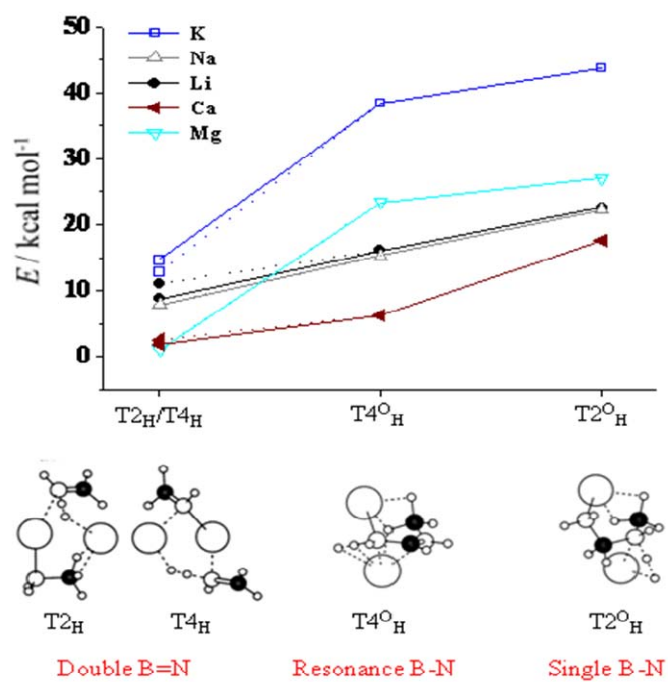

Fig. S1 Systematic increase of the activation energies in the H-steps. Among the H-steps, either  $T_{2H}$  or  $T_{4H}$  leads to the lowest activation barriers, while  $T_{2OH}$  leads to the highest barrier.

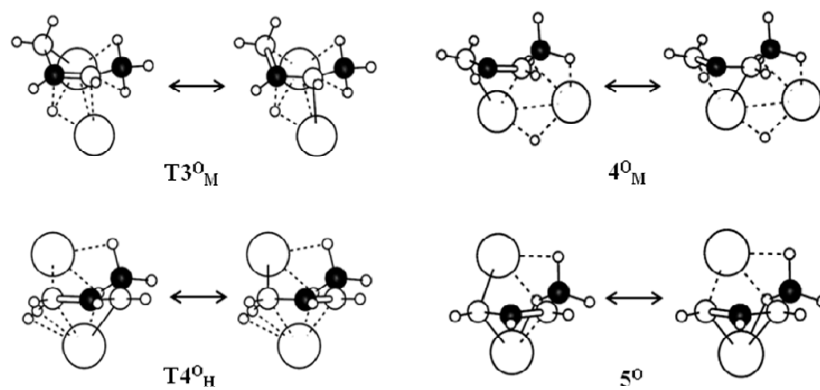

Fig. S2 Resonance ( $M-N-B=N \cdots M \leftrightarrow M \cdots N=B-N-M$ ) hybrid bonds in  $T3^0_M$ ,  $4^0_M$ ,  $T4^0_H$  and  $5^0$ .

**Kinetic scheme of the O/D-pathway.**

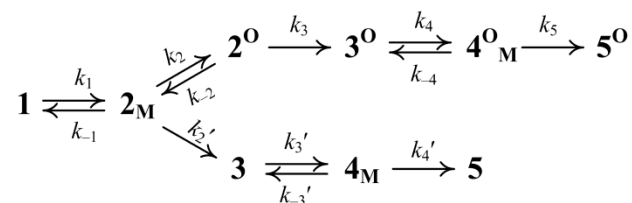

Applying the steady-state approximation, the rate constants are expressed as follows:

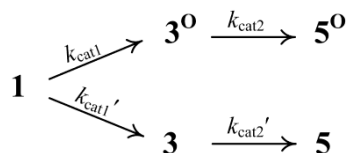

$$k_{\text{cat}1} = \frac{k_1 k_2 k_3}{k_C}$$

$$k_{\text{cat}2} = \frac{k_4 k_5}{k_{-4} + k_5}$$

$$k_{\text{cat}1}' = \frac{k_1 k_2' (k_{-2} + k_3)}{k_C}$$

$$k_{\text{cat}2}' = \frac{k_3' k_4'}{k_{-3}' + k_4'}$$

$$k_C = (k_{-2} + k_3)(k_{-1} + k_2 + k_2') - (k_2 k_{-2})$$

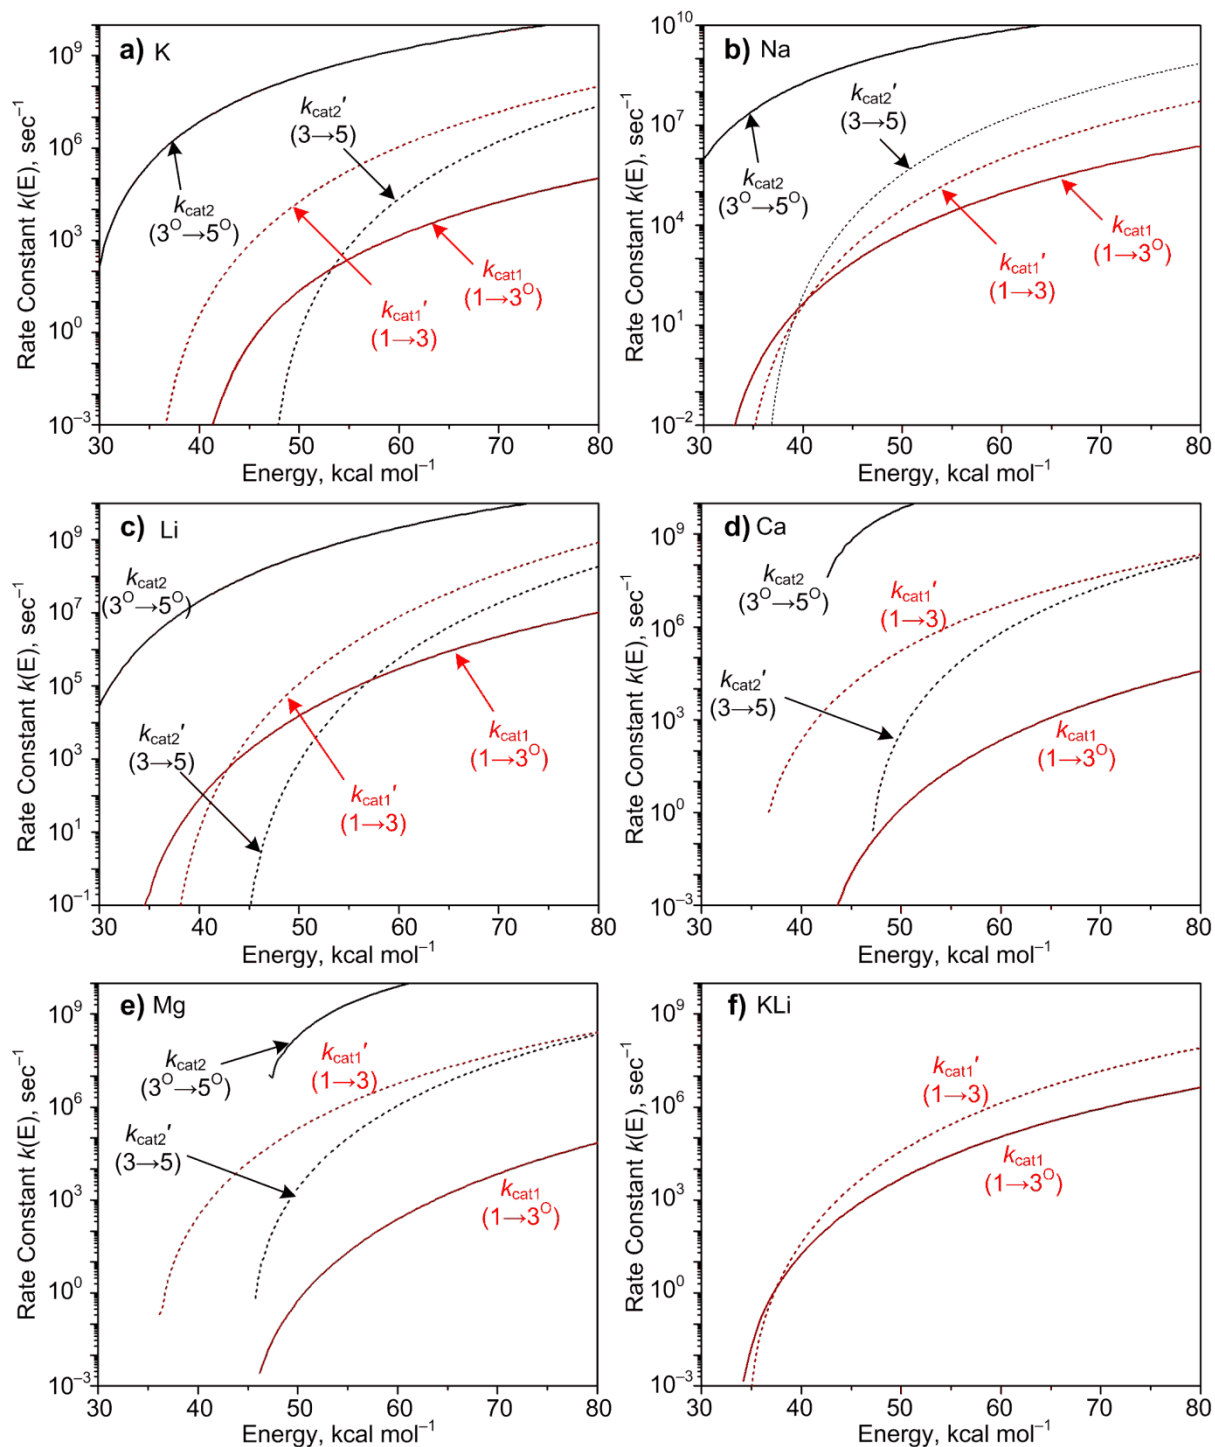

**Fig. S3** Microcanonical rate-energy curve at 0 K for the H<sub>2</sub> release of a) (K<sup>+</sup>[NH<sub>2</sub>BH<sub>3</sub>]<sup>-</sup>)<sub>2</sub>, b) (Na<sup>+</sup>[NH<sub>2</sub>BH<sub>3</sub>]<sup>-</sup>)<sub>2</sub>, c) (Li<sup>+</sup>[NH<sub>2</sub>BH<sub>3</sub>]<sup>-</sup>)<sub>2</sub>, d) Ca<sup>2+</sup>[(NH<sub>2</sub>BH<sub>3</sub>]<sup>-</sup>)<sub>2</sub>, e) Mg<sup>2+</sup>[(NH<sub>2</sub>BH<sub>3</sub>]<sup>-</sup>)<sub>2</sub>, and f) K<sup>+</sup>Li<sup>+</sup>[(NH<sub>2</sub>BH<sub>3</sub>]<sup>-</sup>)<sub>2</sub>.

**Thermal rate constants of  $k_{\text{cat1}}/k_{\text{cat1}}'/k_{\text{cat2}}'$  (in  $\text{s}^{-1}$ ).**

**Table S1** Rate constants of  $k_{\text{cat1}}/k_{\text{cat1}}'/k_{\text{cat2}}'$  (in  $\text{s}^{-1}$ ) at 100–1000 K of the  $\text{H}_2$ -release reaction in  $(\text{K}^+[\text{NH}_2\text{BH}_3]^-)_2$ .

| $T(\text{K})$ | $k_{\text{cat1}}$      | $k_{\text{cat1}}'$     | $k_{\text{cat2}}'$     |
|---------------|------------------------|------------------------|------------------------|
| 100           | $1.55 \times 10^{-5}$  | $3.53 \times 10^{-67}$ | $1.20 \times 10^{-64}$ |
| 200           | $4.00 \times 10^{-32}$ | $2.82 \times 10^{-27}$ | $3.29 \times 10^{-26}$ |
| 300           | $1.41 \times 10^{-17}$ | $6.86 \times 10^{-14}$ | $2.57 \times 10^{-13}$ |
| 400           | $2.35 \times 10^{-10}$ | $3.76 \times 10^{-7}$  | $7.98 \times 10^{-7}$  |
| 500           | $4.33 \times 10^{-6}$  | $4.41 \times 10^{-3}$  | $6.69 \times 10^{-3}$  |
| 600           | $2.69 \times 10^{-3}$  | $2.36 \times 10^0$     | $2.87 \times 10^0$     |
| 700           | $2.49 \times 10^{-1}$  | $2.14 \times 10^2$     | $2.23 \times 10^2$     |
| 800           | $7.07 \times 10^0$     | $6.24 \times 10^3$     | $5.90 \times 10^3$     |
| 900           | $8.85 \times 10^1$     | $8.13 \times 10^4$     | $7.39 \times 10^4$     |
| 1000          | $5.92 \times 10^2$     | $5.61 \times 10^5$     | $5.26 \times 10^5$     |

**Table S2** Rate constants of  $k_{\text{cat1}}/k_{\text{cat1}}'/k_{\text{cat2}}'$  (in  $\text{s}^{-1}$ ) at 100–1000 K of the  $\text{H}_2$ -release reaction in  $(\text{Na}^+[\text{NH}_2\text{BH}_3]^-)_2$ .

| $T(\text{K})$ | $k_{\text{cat1}}$      | $k_{\text{cat1}}'$     | $k_{\text{cat2}}'$     |
|---------------|------------------------|------------------------|------------------------|
| 100           | $2.62 \times 10^{-59}$ | $2.68 \times 10^{-63}$ | $2.43 \times 10^{-61}$ |
| 200           | $3.40 \times 10^{-24}$ | $1.17 \times 10^{-25}$ | $2.75 \times 10^{-24}$ |
| 300           | $1.43 \times 10^{-12}$ | $4.94 \times 10^{-13}$ | $7.95 \times 10^{-12}$ |
| 400           | $8.80 \times 10^{-7}$  | $1.11 \times 10^{-6}$  | $1.47 \times 10^{-5}$  |
| 500           | $2.59 \times 10^{-3}$  | $7.58 \times 10^{-3}$  | $8.63 \times 10^{-2}$  |
| 600           | $5.31 \times 10^{-1}$  | $2.80 \times 10^0$     | $2.83 \times 10^1$     |
| 700           | $2.39 \times 10^1$     | $1.94 \times 10^2$     | $1.77 \times 10^3$     |
| 800           | $4.14 \times 10^2$     | $4.67 \times 10^3$     | $3.92 \times 10^4$     |
| 900           | $3.72 \times 10^3$     | $5.33 \times 10^4$     | $4.28 \times 10^5$     |
| 1000          | $2.01 \times 10^4$     | $3.39 \times 10^5$     | $2.76 \times 10^6$     |

**Table S3** Rate constants of  $k_{\text{cat1}}/k_{\text{cat1}}'/k_{\text{cat2}}'$  (in  $\text{s}^{-1}$ ) at 100–1000 K of the  $\text{H}_2$ -release reaction in  $(\text{Li}^+[\text{NH}_2\text{BH}_3]^-)_2$ .

| $T(\text{K})$ | $k_{\text{cat1}}$      | $k_{\text{cat1}}'$     | $k_{\text{cat2}}'$     |
|---------------|------------------------|------------------------|------------------------|
| 100           | $6.65 \times 10^{-63}$ | $5.68 \times 10^{-70}$ | $4.04 \times 10^{-67}$ |
| 200           | $1.11 \times 10^{-25}$ | $2.85 \times 10^{-28}$ | $3.19 \times 10^{-27}$ |
| 300           | $2.71 \times 10^{-13}$ | $3.33 \times 10^{-14}$ | $8.72 \times 10^{-14}$ |
| 400           | $4.15 \times 10^{-7}$  | $4.13 \times 10^{-7}$  | $5.20 \times 10^{-7}$  |
| 500           | $2.14 \times 10^{-3}$  | $7.98 \times 10^{-3}$  | $6.47 \times 10^{-3}$  |
| 600           | $6.43 \times 10^{-1}$  | $5.99 \times 10^0$     | $3.62 \times 10^0$     |
| 700           | $3.83 \times 10^1$     | $6.95 \times 10^2$     | $3.42 \times 10^2$     |
| 800           | $8.23 \times 10^2$     | $2.46 \times 10^4$     | $1.05 \times 10^4$     |
| 900           | $8.77 \times 10^3$     | $3.73 \times 10^5$     | $1.49 \times 10^5$     |
| 1000          | $5.44 \times 10^4$     | $2.93 \times 10^6$     | $1.18 \times 10^6$     |

**Table S4** Rate constants of  $k_{\text{cat1}}/k_{\text{cat1}}'/k_{\text{cat2}}'$  (in  $\text{s}^{-1}$ ) at 100–1000 K of the  $\text{H}_2$ -release reaction in  $\text{Ca}^{2+}([\text{NH}_2\text{BH}_3]^-)_2$ .

| $T(\text{K})$ | $k_{\text{cat1}}$      | $k_{\text{cat1}}'$     | $k_{\text{cat2}}'$     |
|---------------|------------------------|------------------------|------------------------|
| 100           | $1.67 \times 10^{-83}$ | $3.85 \times 10^{-67}$ | $4.35 \times 10^{-65}$ |
| 200           | $1.17 \times 10^{-36}$ | $3.01 \times 10^{-27}$ | $2.40 \times 10^{-26}$ |

Supplementary Material (ESI) for *PCCP*

This journal is © the Owner Societies 2010

|      |                        |                        |                        |
|------|------------------------|------------------------|------------------------|
| 300  | $4.96 \times 10^{-21}$ | $6.70 \times 10^{-14}$ | $2.59 \times 10^{-13}$ |
| 400  | $3.40 \times 10^{-13}$ | $3.41 \times 10^{-7}$  | $9.38 \times 10^{-7}$  |
| 500  | $1.78 \times 10^{-8}$  | $3.76 \times 10^{-3}$  | $8.44 \times 10^{-3}$  |
| 600  | $2.57 \times 10^{-5}$  | $1.90 \times 10^0$     | $3.75 \times 10^0$     |
| 700  | $4.70 \times 10^{-3}$  | $1.65 \times 10^2$     | $2.97 \times 10^2$     |
| 800  | $2.33 \times 10^{-1}$  | $4.70 \times 10^3$     | $7.99 \times 10^3$     |
| 900  | $4.61 \times 10^0$     | $6.25 \times 10^4$     | $1.04 \times 10^5$     |
| 1000 | $4.51 \times 10^1$     | $4.69 \times 10^5$     | $7.88 \times 10^5$     |

**Table S5** Rate constants of  $k_{\text{cat1}}/k_{\text{cat1}}'/k_{\text{cat2}}'$  (in  $\text{s}^{-1}$ ) at 100–1000 K of the  $\text{H}_2$ -release reaction in  $\text{Mg}^{2+}([\text{NH}_2\text{BH}_3]^-)_2$ .

| $T(\text{K})$ | $k_{\text{cat1}}$      | $k_{\text{cat1}}'$     | $k_{\text{cat2}}'$     |
|---------------|------------------------|------------------------|------------------------|
| 100           | $5.19 \times 10^{-89}$ | $3.01 \times 10^{-67}$ | $6.05 \times 10^{-67}$ |
| 200           | $8.05 \times 10^{-39}$ | $2.22 \times 10^{-27}$ | $2.94 \times 10^{-27}$ |
| 300           | $3.90 \times 10^{-22}$ | $5.46 \times 10^{-14}$ | $6.35 \times 10^{-14}$ |
| 400           | $8.36 \times 10^{-14}$ | $2.95 \times 10^{-7}$  | $3.25 \times 10^{-7}$  |
| 500           | $8.33 \times 10^{-9}$  | $3.37 \times 10^{-3}$  | $3.62 \times 10^{-3}$  |
| 600           | $1.80 \times 10^{-5}$  | $1.75 \times 10^0$     | $1.86 \times 10^0$     |
| 700           | $4.38 \times 10^{-3}$  | $1.56 \times 10^2$     | $1.64 \times 10^2$     |
| 800           | $2.65 \times 10^{-1}$  | $4.56 \times 10^3$     | $4.80 \times 10^3$     |
| 900           | $6.02 \times 10^0$     | $6.22 \times 10^4$     | $6.65 \times 10^4$     |
| 1000          | $6.47 \times 10^1$     | $4.77 \times 10^5$     | $5.33 \times 10^5$     |

**Table S6** Rate constants of  $k_{\text{cat1}}/k_{\text{cat1}}'$  (in  $\text{s}^{-1}$ ) at 100–1000 K of the  $\text{H}_2$ -release reaction in  $(\text{Li}^+[\text{NH}_2\text{BH}_2\text{CH}_3]^-)_2$  and  $\text{K}^+\text{Li}^+([\text{NH}_2\text{BH}_3]^-)_2$ .

| $T(\text{K})$ | $(\text{Li}^+[\text{NH}_2\text{BH}_2\text{CH}_3]^-)_2$ |                        | $\text{K}^+\text{Li}^+([\text{NH}_2\text{BH}_3]^-)_2$ |
|---------------|--------------------------------------------------------|------------------------|-------------------------------------------------------|
|               | $k_{\text{cat1}}$                                      | $k_{\text{cat1}}$      | $k_{\text{cat1}}'$                                    |
| 100           | $7.99 \times 10^{-63}$                                 | $3.56 \times 10^{-63}$ | $1.43 \times 10^{-64}$                                |
| 200           | $1.73 \times 10^{-24}$                                 | $6.63 \times 10^{-26}$ | $3.47 \times 10^{-26}$                                |
| 300           | $1.50 \times 10^{-11}$                                 | $1.58 \times 10^{-13}$ | $2.65 \times 10^{-13}$                                |
| 400           | $5.08 \times 10^{-5}$                                  | $2.35 \times 10^{-7}$  | $8.06 \times 10^{-7}$                                 |
| 500           | $4.50 \times 10^{-1}$                                  | $1.18 \times 10^{-3}$  | $6.60 \times 10^{-3}$                                 |
| 600           | $2.01 \times 10^2$                                     | $3.48 \times 10^{-1}$  | $2.77 \times 10^0$                                    |
| 700           | $1.58 \times 10^4$                                     | $2.03 \times 10^1$     | $2.12 \times 10^2$                                    |
| 800           | $3.80 \times 10^5$                                     | $4.31 \times 10^2$     | $5.49 \times 10^3$                                    |
| 900           | $3.60 \times 10^6$                                     | $4.50 \times 10^3$     | $6.65 \times 10^4$                                    |
| 1000          | $1.60 \times 10^7$                                     | $2.72 \times 10^4$     | $4.43 \times 10^5$                                    |



**Relative energies along the reaction pathways.**

**Table S7** MP2/6-311++G\*\* relative energies ( $\Delta E$ ) and ZPE-corrected energies ( $\Delta E_0$ ) for  $(\text{K}^+/\text{Na}^+/\text{Li}^+[\text{NH}_2\text{BH}_3]^-)_2$  and  $\text{Ca}^{2+}/\text{Mg}^{2+}([\text{NH}_2\text{BH}_3]^-)_2$  along the **O**-pathway.

|    |              | 1    | T1 <sub>M</sub> | 2 <sub>M</sub> | T2 <sup>O</sup> | 2 <sup>O</sup> | T2 <sup>O</sup> <sub>H</sub> | 3 <sup>O</sup> | T3 <sup>O</sup> <sub>M</sub> | 4 <sup>O</sup> <sub>M</sub> | T4 <sup>O</sup> <sub>H</sub> | 5 <sup>O</sup> |
|----|--------------|------|-----------------|----------------|-----------------|----------------|------------------------------|----------------|------------------------------|-----------------------------|------------------------------|----------------|
| K  | $\Delta E$   | 0.00 | 39.36           | 33.92          | 41.83           | 17.96          | 36.46                        | 15.81          | 38.56                        | 22.45                       | 31.57                        | 20.89          |
|    | $\Delta E_0$ | 0.00 | 36.14           | 30.90          | 39.12           | 17.35          | 34.88                        | 9.30           | 29.73                        | 14.38                       | 20.62                        | 8.49           |
| Na | $\Delta E$   | 0.00 | 32.76           | 29.13          | 34.13           | 9.99           | 35.73                        | 18.33          | 35.41                        | 17.32                       | 35.21                        | 21.93          |
|    | $\Delta E_0$ | 0.00 | 30.00           | 26.31          | 31.84           | 10.02          | 32.25                        | 12.01          | 26.82                        | 9.57                        | 24.79                        | 9.59           |
| Li | $\Delta E$   | 0.00 | 31.08           | 29.50          | 32.34           | 11.91          | 37.87                        | 12.17          | 30.51                        | 20.27                       | 39.39                        | 19.88          |
|    | $\Delta E_0$ | 0.00 | 27.85           | 26.48          | 29.95           | 11.42          | 34.00                        | 5.94           | 21.83                        | 11.92                       | 28.00                        | 7.06           |
| Ca | $\Delta E$   | 0.00 | 39.27           | 36.29          | 39.25           | 16.46          | 46.38                        | 39.77          | 45.32                        | 27.25                       | 52.87                        | 42.48          |
|    | $\Delta E_0$ | 0.00 | 35.72           | 33.36          | 36.49           | 15.90          | 42.92                        | 33.38          | 37.23                        | 18.92                       | 42.34                        | 29.54          |
| Mg | $\Delta E$   | 0.00 | 26.21           | 26.19          | 27.00           | 2.15           | 49.46                        | 43.49          | 47.49                        | 16.92                       | 58.28                        | 45.97          |
|    | $\Delta E_0$ | 0.00 | 23.07           | 23.35          | 24.76           | 2.18           | 45.95                        | 36.43          | 38.90                        | 8.67                        | 47.12                        | 31.85          |

**Table S8** MP2/6-311++G\*\* relative energies ( $\Delta E$ ) and ZPE-corrected energies ( $\Delta E_0$ ) for  $(\text{K}^+/\text{Na}^+/\text{Li}^+[\text{NH}_2\text{BH}_3]^-)_2$  and  $\text{Ca}^{2+}/\text{Mg}^{2+}([\text{NH}_2\text{BH}_3]^-)_2$  along the **D**-pathway.

|    |              | T2 <sub>H</sub> | 3     | T3 <sub>M</sub> | 4 <sub>M</sub> | T4 <sub>H</sub> | 5     |
|----|--------------|-----------------|-------|-----------------|----------------|-----------------|-------|
| K  | $\Delta E$   | 39.22           | 20.20 | 58.08           | 53.48          | 57.98           | 39.00 |
|    | $\Delta E_0$ | 33.46           | 12.77 | 47.64           | 42.99          | 44.73           | 23.84 |
| Na | $\Delta E$   | 39.67           | 18.11 | 51.37           | 46.61          | 57.47           | 35.31 |
|    | $\Delta E_0$ | 34.21           | 10.77 | 41.15           | 36.52          | 44.28           | 20.68 |
| Li | $\Delta E$   | 44.02           | 16.39 | 47.76           | 46.35          | 58.58           | 32.21 |
|    | $\Delta E_0$ | 37.55           | 8.71  | 37.20           | 36.04          | 44.81           | 17.26 |
| Ca | $\Delta E$   | 39.86           | 19.51 | 58.13           | 55.99          | 59.36           | 39.21 |
|    | $\Delta E_0$ | 34.48           | 11.94 | 47.01           | 45.37          | 46.37           | 24.02 |
| Mg | $\Delta E$   | 41.41           | 17.27 | 42.10           | 41.55          | 58.46           | 34.87 |
|    | $\Delta E_0$ | 36.14           | 9.60  | 31.54           | 30.99          | 45.57           | 19.55 |

**Table S9** MP2/6-311++G\*\* relative energies ( $\Delta E$ ) and ZPE corrected energies ( $\Delta E_0$ ) for  $\text{K}^+\text{Li}^+([\text{NH}_2\text{BH}_3]^-)_2$  along the **O/D**-pathway.

|              | 1    | T1 <sub>M</sub> | 2 <sub>M</sub> | T2 <sup>O</sup> | 2 <sup>O</sup> | T2 <sup>O</sup> <sub>H</sub> | 3 <sup>O</sup> | T2 <sub>H</sub> | 3     |
|--------------|------|-----------------|----------------|-----------------|----------------|------------------------------|----------------|-----------------|-------|
| $\Delta E$   | 0.00 | 34.32           | 31.04          | 35.10           | 14.51          | 37.92                        | 14.45          | 40.25           | 17.11 |
| $\Delta E_0$ | 0.00 | 31.42           | 28.13          | 32.86           | 14.24          | 34.10                        | 8.32           | 34.83           | 9.81  |

**Table S10** MP2/6-311++G\*\* relative energies ( $\Delta E$ ) and ZPE corrected energies ( $\Delta E_0$ ) for  $(\text{Li}^+[\text{NH}_2\text{BH}_2\text{CH}_3]^-)_2$  along the **D**-pathway.

|              | 1    | T1 <sub>M</sub> | 2 <sub>M</sub> | T2 <sub>H</sub> | 3     |
|--------------|------|-----------------|----------------|-----------------|-------|
| $\Delta E$   | 0.00 | 25.30           | 24.32          | 40.88           | 13.30 |
| $\Delta E_0$ | 0.00 | 22.33           | 21.20          | 34.40           | 5.65  |
